# Supplementary material for: Transcriptomic Insights: Phytogenic Modulation of Buffel Grass (Cenchrus ciliaris) Seedling Emergence
Source: MDPI journal article supplement (doi:10.3390/plants13091174), 2024-04-23
Supplement: s1 [file s1]

**Supplementary Table S1.** Pathways and their related differentially expressed genes identified in PHY.

| Pathway                               | Upregulated genes | Gene name (protein name)                                 | Downregulated genes | Gene name (protein name)                       |
|---------------------------------------|-------------------|----------------------------------------------------------|---------------------|------------------------------------------------|
| 5-Hydroxytryptamine biosynthesis      | Os10g0400500      | OsTDC1                                                   |                     |                                                |
|                                       | Os07g0437500      | TDC2                                                     |                     |                                                |
|                                       | Os09g0539100      | 3-dehydroquinate synthase                                |                     |                                                |
| Chorismate biosynthesis               | Os01g0102600      | Shikimate kinase                                         |                     |                                                |
|                                       | Os10g0577700      | Shikimate kinase                                         |                     |                                                |
|                                       | Os10g0510000      | ACT2                                                     | Os03g0836000        | ACT3                                           |
| Cytoskeletal regulation by Rho GTPase | Os10g0323600      | Profilin-A                                               | Os12g0163700        | -                                              |
|                                       | Os03g0718100      | Actin-1                                                  |                     |                                                |
|                                       | Os01g0282800      | TUBB1                                                    |                     |                                                |
|                                       | Os03g0661300      | TUBB8                                                    |                     |                                                |
|                                       | Os02g0778400      | UMP-CMP kinase 4                                         | Os08g0500900        | Phosphoribosylglycinamide formyl transferase 1 |
| De novo purine biosynthesis           | Os03g0699300      | PURA2                                                    | Os05g0270800        | Phosphoribosylglycinamide formyl transferase 1 |
|                                       | Os03g0320900      | V2                                                       |                     |                                                |
|                                       | Os12g0236400      | ADK-A                                                    |                     |                                                |
|                                       | Os12g0548300      | Nucleoside diphosphate kinase                            |                     |                                                |
|                                       | Os03g0102100      | Formyltetrahydrofolate deformylase family protein        |                     |                                                |
|                                       | Os08g19140        | Adenylate monophosphate kinase 5                         |                     |                                                |
|                                       | Os10g0503200      | Folylpolyglutamate synthase                              |                     |                                                |
| Formyltetrahydrofolate biosynthesis   | Os03g0102100      | Formyltetrahydrofolate deformylase family protein        |                     |                                                |
|                                       | Os03g0337600      | Uroporphyrinogen decarboxylase 2                         | Os01g0631200        | Uroporphyrinogen-III C-methyltransferase       |
| Heme biosynthesis                     | Os03g0340001      | -                                                        |                     |                                                |
|                                       | Os02g0168800      | HEMC                                                     |                     |                                                |
|                                       | Os02g0121000      | Glutamate--tRNA ligase                                   |                     |                                                |
|                                       | Os01g0622300      | Uroporphyrinogen decarboxylase 1                         |                     |                                                |
|                                       | Os06g0704600      | HEMB                                                     |                     |                                                |
|                                       | Os08g0532200      | GSA                                                      |                     |                                                |
|                                       | Os05g0558400      | Branched-chain-amino-acid aminotransferase               |                     |                                                |
| Isoleucine biosynthesis               | Os02g0510200      | ALSI                                                     |                     |                                                |
| Leucine biosynthesis                  | Os05g0558400      | Branched-chain-amino-acid aminotransferase               |                     |                                                |
|                                       | Os03g0655700      | 3-isopropylmalate dehydrogenase                          |                     |                                                |
| Lysine biosynthesis                   | Os03g0118600      | Dihydrodipicolinate reductase, C-terminus family protein | Os07g0461900        | -                                              |
|                                       | Os03g0850700      | -                                                        | Os05g0129100        | -                                              |
|                                       | Os02g0436400      | DAPBI                                                    |                     |                                                |
|                                       | Os03g0117000      | -                                                        |                     |                                                |
|                                       | Os07g0300900      | Aspartate kinase                                         |                     |                                                |

|                                    |              |                                                               |              |                                              |
|------------------------------------|--------------|---------------------------------------------------------------|--------------|----------------------------------------------|
| Pyruvate metabolism                | Os08g0562100 | Malate dehydrogenase (NADP(+))                                | Os02g0232400 | Citrate synthase                             |
|                                    | Os02g0194100 | Citrate synthase                                              | Os12g0183100 | 2-oxoisovalerate dehydrogenase alpha subunit |
|                                    | Os01g0300200 | <i>ACLB-1</i>                                                 |              |                                              |
|                                    | Os02g0739600 | Pyruvate dehydrogenase E1 component subunit alpha-1           |              |                                              |
| Salvage pyrimidine ribonucleotides | Os05g0455700 | Uracil phosphoribosyl transferase                             |              |                                              |
|                                    | Os02g0778400 | UMP-CMP kinase 4                                              |              |                                              |
|                                    | Os05g0182201 | Hypoxanthine phosphoribosyl transferase                       |              |                                              |
| TCA cycle                          | Os08g0562100 | Malate dehydrogenase (NADP(+))                                |              |                                              |
|                                    | Os02g0194100 | Citrate synthase                                              |              |                                              |
|                                    | Os02g0739600 | Pyruvate dehydrogenase E1 component subunit alpha-1 (PDHE1-A) |              |                                              |
|                                    | Os07g0577700 | Succinate--CoA ligase [ADP-forming] subunit alpha             |              |                                              |

**Supplementary Table S2.** Pathways and their related differentially expressed genes identified in PHY.

| Pathway                                         | Upregulated genes | Gene name (protein name)                          | Downregulated genes | Gene name (protein name)                       |
|-------------------------------------------------|-------------------|---------------------------------------------------|---------------------|------------------------------------------------|
| 5-Hydroxytryptamine degradation                 | Os01g0591000      | <i>ALDH1a</i>                                     | Os02g0730000        | <i>Aldh2a</i>                                  |
|                                                 |                   |                                                   | Os06g0270900        | <i>Aldh2b</i>                                  |
|                                                 |                   |                                                   | Os09g0440300        | Aldehyde dehydrogenase (NAD(+))                |
| Apoptosis signalling pathway                    | Os01g0908100      | <i>MPK3</i>                                       | Os02g0148100        | <i>MPK3</i>                                    |
|                                                 | Os08g0157000      | <i>MPK2</i>                                       | Os03g0276500        | 70 kDa heat shock protein                      |
|                                                 | Os02g0797400      | <i>MCM5</i>                                       | Os11g0703900        | Heat shock cognate 70 kDa protein              |
|                                                 | Os01g0885000      | CYTOCHROME C-2                                    | Os06g0699400        | <i>MPK4</i>                                    |
|                                                 | Os05g0420600      | <i>Cytochrome c</i>                               | Os03g0710500        | <i>BIP2</i>                                    |
| Cadherin signalling pathway                     | Os10g0510000      | <i>Actin-2</i>                                    | Os03g0836000        | <i>ACT3</i>                                    |
|                                                 | Os03g0718100      | <i>Actin-1</i>                                    | Os12g0163700        | -                                              |
| De novo pyrimidine ribonucleotides biosynthesis | Os02g0778400      | UMP-CMP kinase 4                                  | Os01g0616900        | CTP synthase                                   |
|                                                 | Os12g0548300      | Nucleoside diphosphate kinase                     |                     |                                                |
| Folate biosynthesis                             | Os10g0503200      | Folylpolyglutamate synthase                       | Os08g0500900        | Phosphoribosylglycinamide formyl transferase 1 |
|                                                 | Os03g0102100      | Formyltetrahydrofolate deformylase family protein | Os05g0270800        | Phosphoribosylglycinamide formyl transferase 1 |
| Glycolysis                                      | Os07g0181000      | <i>OsPK2</i>                                      | Os08g0478800        | Glucose-6-phosphate isomerase                  |
|                                                 | Os09g0535000      | Triosephosphate isomerase                         | Os09g0465600        | Glucose-6-phosphate isomerase                  |
| Pentose phosphate pathway                       | Os08g0154300      | Transaldolase                                     | Os08g0478800        | Glucose-6-phosphate isomerase                  |
|                                                 |                   |                                                   | Os06g0129100        | -                                              |
|                                                 |                   |                                                   | Os09g0465600        | Glucose-6-phosphate isomerase                  |
| Threonine biosynthesis                          | Os03g0850700      | -                                                 | Os01g0693800        | Threonine synthase                             |
|                                                 | Os07g0300900      | Aspartate kinase                                  |                     |                                                |
| Tryptophan biosynthesis                         | Os04g0467700      | Indole-3-glycerol-phosphate synthase              | Os06g0632200        | Tryptophan synthase                            |
|                                                 |                   |                                                   | Os08g0135900        | Tryptophan synthase                            |

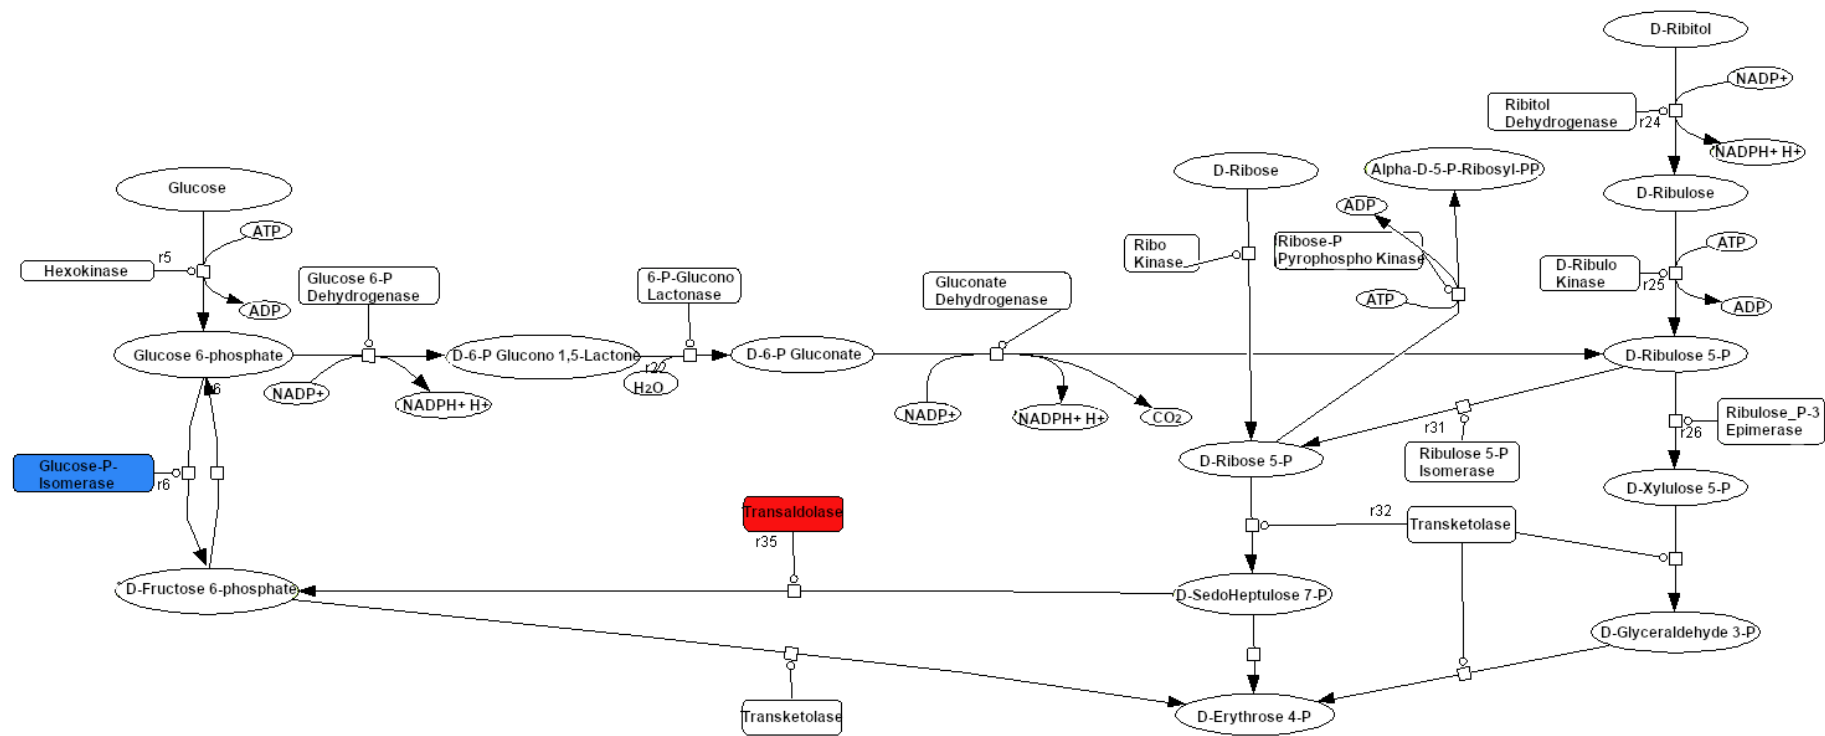

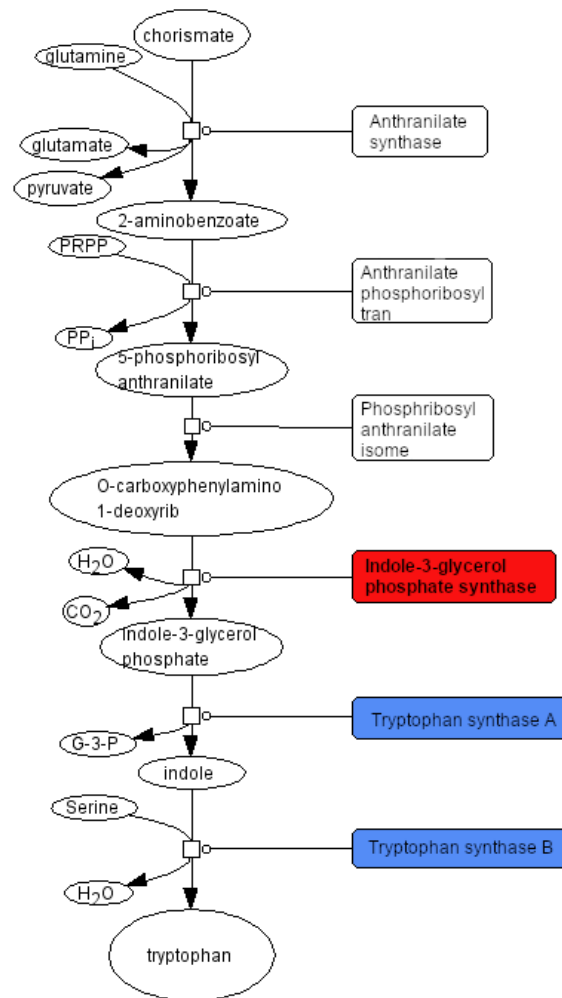

**Supplementary Figure S2.** Tryptophan biosynthesis with differential expressed genes in PHY. The inhibitory and activated enzymes are highlighted by blue and red, respectively.

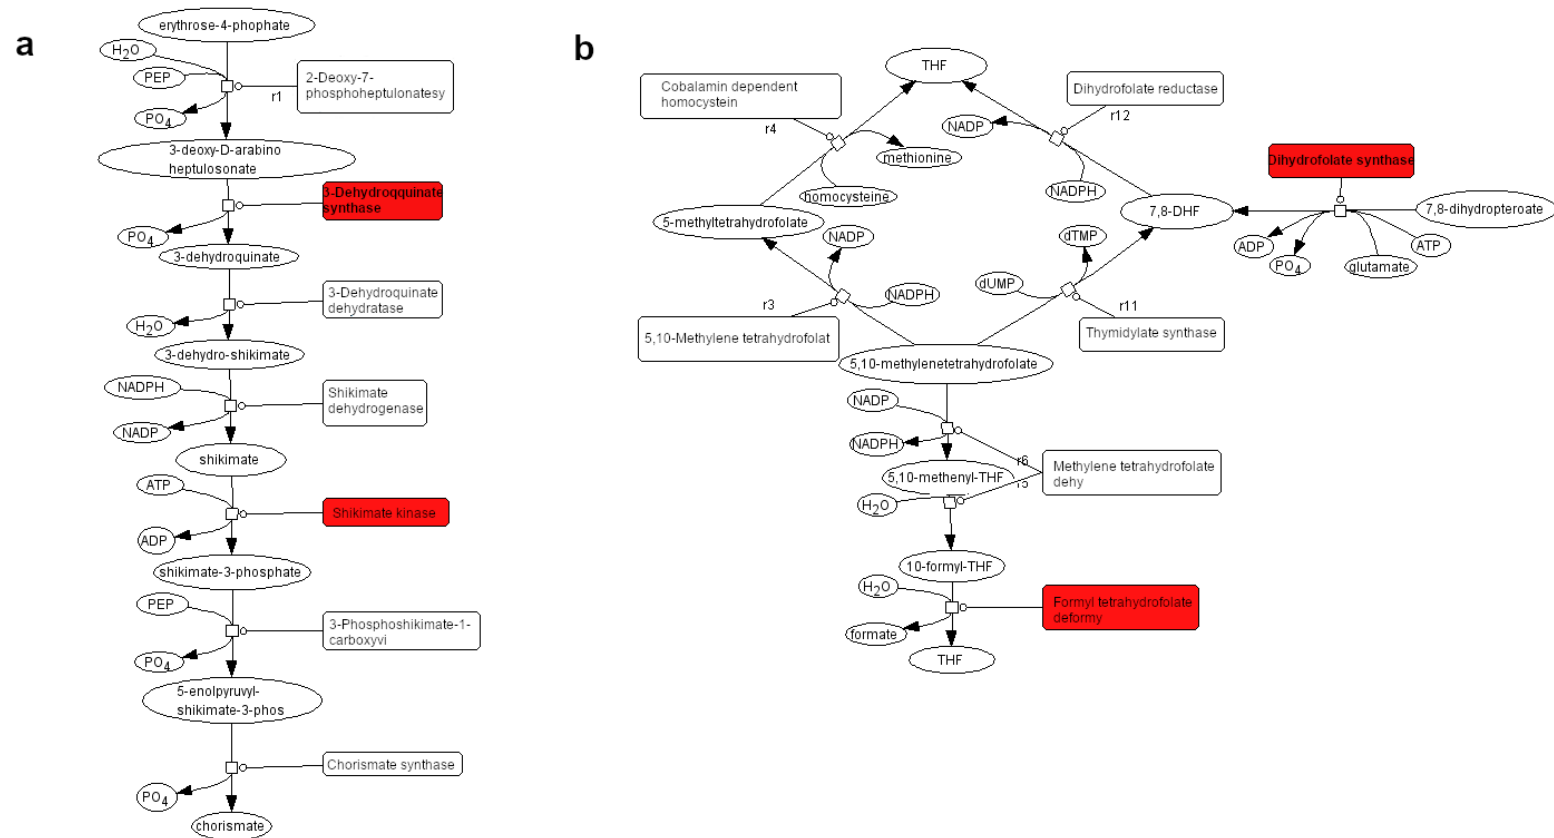

**Supplementary Figure S3.** Pathways with differential expressed genes in PHY. Panel a) represents chorismate biosynthesis; panel b) represents formyltetrahydrofolate biosynthesis. Enzyme encoded by highly expressed gene is highlighted by red.

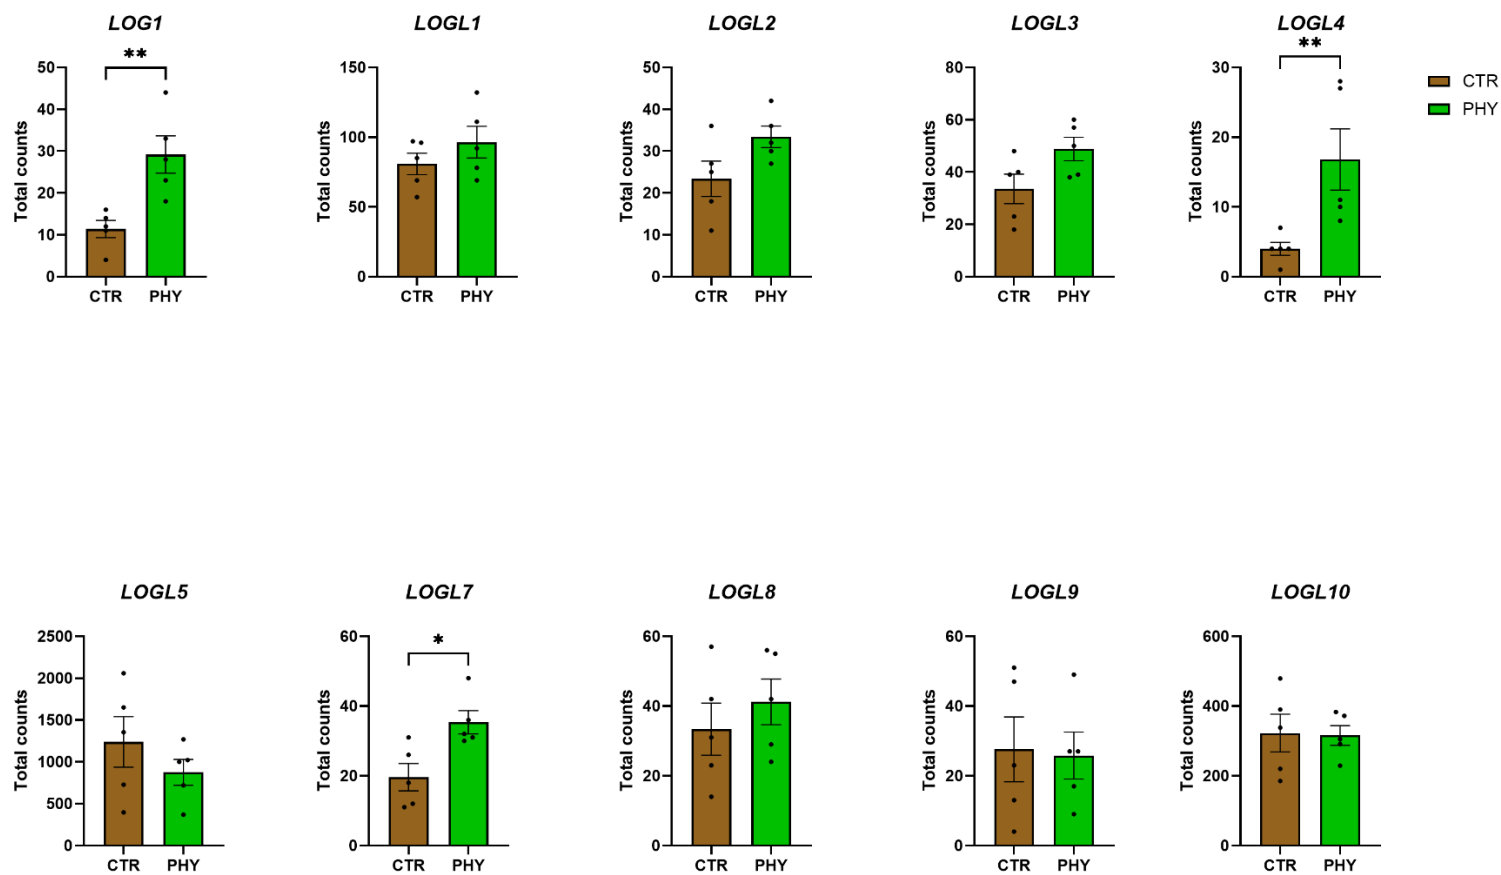

**Supplementary Figure S4.** *LOG* gene family RNA-seq count between control and PHY treatment. Data are mean  $\pm$  SEM ( $n = 5$ ).

Asterisks indicate significant difference by Mann-Whitney  $t$ -test, \* =  $p < 0.05$ , \*\* =  $p < 0.01$ .
